# Supplementary material for: Emergence of Hybrid Resistance and Virulence Plasmids Harboring New Delhi Metallo-β-Lactamase in Klebsiella pneumoniae in Russia
Source: Antibiotics (Basel). 2021 Jun 9;10(6):691. doi: 10.3390/antibiotics10060691 (PMC8226487; doi:10.3390/antibiotics10060691)
Supplement: Supplementary file 1 [file antibiotics-10-00691-s001.zip]

Archive with 7 entries (7 files):
- Supplementary Material Fig S1.pdf
- Supplementary Material Fig S2.pdf
- Supplementary Material Fig S3.pdf
- Supplementary Material Tab S1.pdf
- Supplementary Material Tab S2.pdf
- Supplementary Material Tab S4.pdf
- Supplementary Material Text S1.pdf
