# Supplementary material for: Emergence of Hybrid Resistance and Virulence Plasmids Harboring New Delhi Metallo-β-Lactamase in Klebsiella pneumoniae in Russia
Source: Antibiotics (Basel). 2021 Jun 9;10(6):691. doi: 10.3390/antibiotics10060691 (PMC8226487; doi:10.3390/antibiotics10060691)
Supplement: Supplementary file 1 [file antibiotics-10-00691-s001.zip › Supplementary Material Fig S3.pdf]

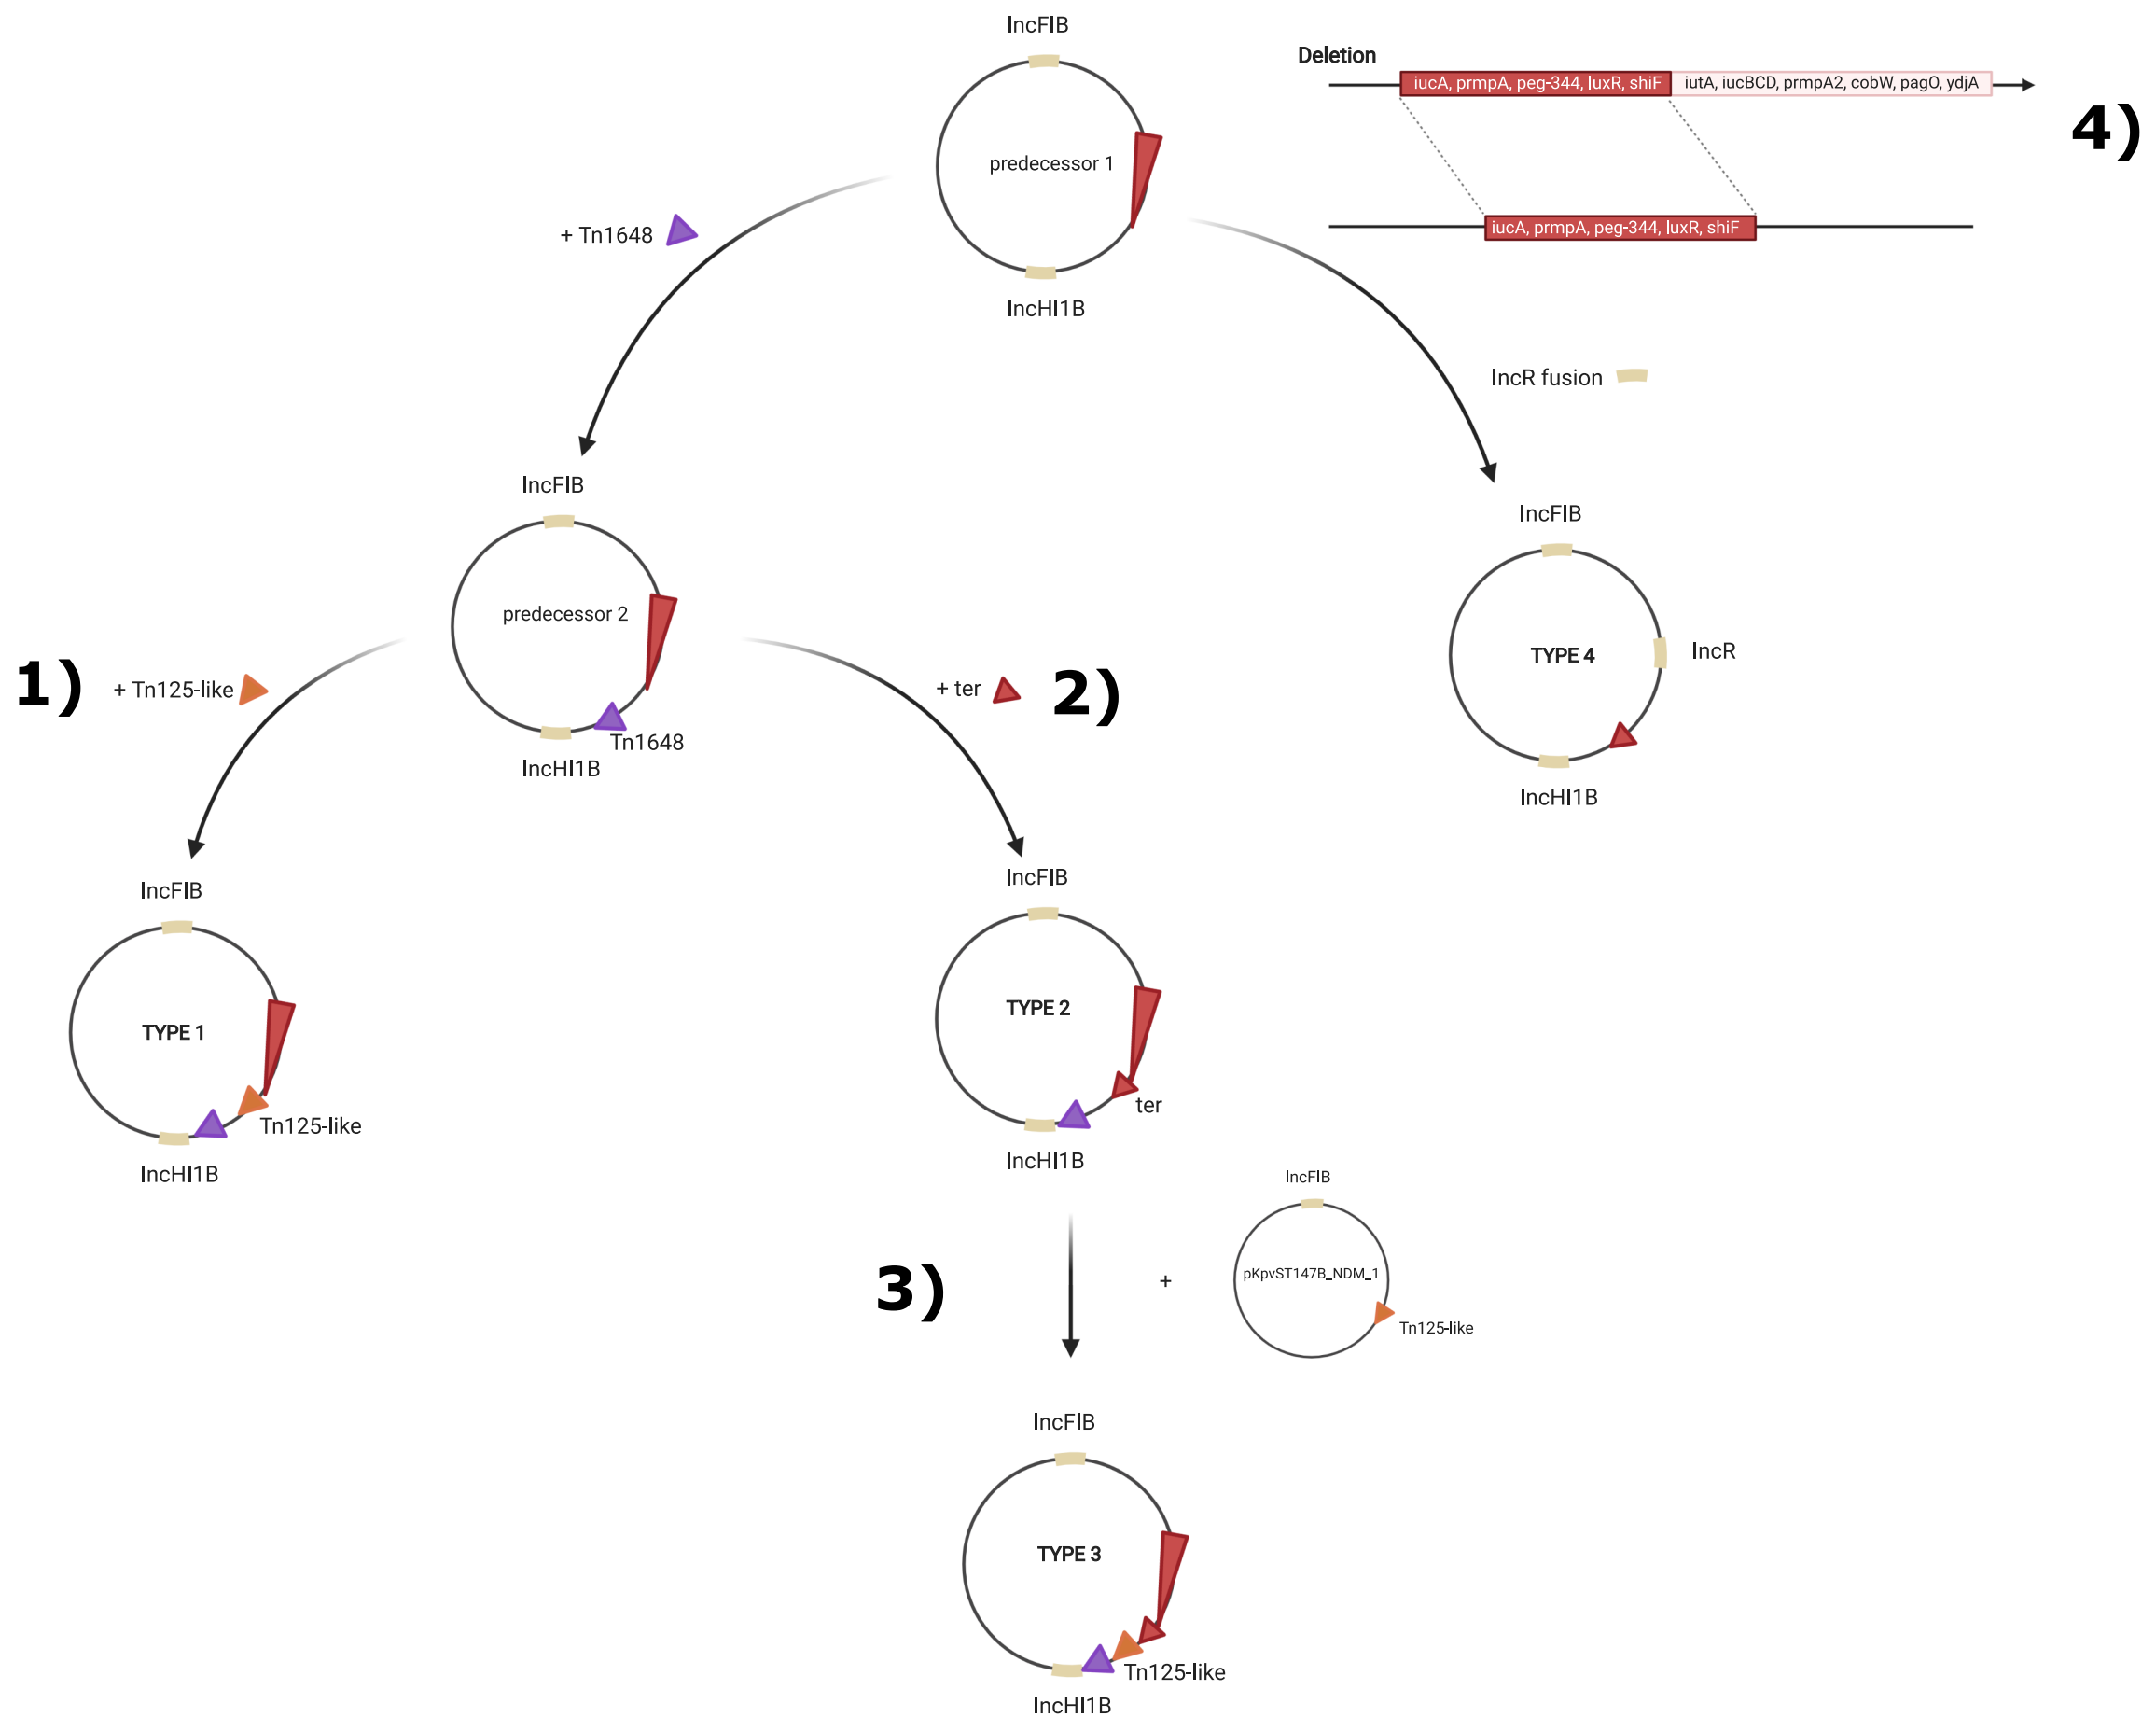

**Figure S3:** Possible evolutionary pathways that generated 4 distinct types of mosaic plasmids are: (1) the acquisition of Tn-125-like (such as study isolates 1970\_kpn, 1971\_kpn, 2501\_kpn) or (2) tellurium resistance gene cluster (such as pKpvST147B\_virulence in KpvST147B\_SE1\_1\_NDM strain) by predecessor 2 following the acquisition by predecessor 1 of region containing Tn1548; (3) acquisition of Tn125-like form IncFIB plasmid by type 2 plasmid (such as study isolates 1659\_kpn, 2471\_kpn, 2512\_kpn, 2566\_kpn); (4) deletion the part of the region containing genes associated with hypervirulence (iutA, iucBCD, prmpA2, cobW, pagO, ydjA) and fusion with IncR plasmid (phvKpST395\_2024 in such as study isolate 2024\_kpn).
