# Supplementary material for: Emergence of Hybrid Resistance and Virulence Plasmids Harboring New Delhi Metallo-β-Lactamase in Klebsiella pneumoniae in Russia
Source: Antibiotics (Basel). 2021 Jun 9;10(6):691. doi: 10.3390/antibiotics10060691 (PMC8226487; doi:10.3390/antibiotics10060691)
Supplement: Supplementary file 1 [file antibiotics-10-00691-s001.zip › Supplementary Material Tab S1.pdf]

**Table S1:** The clinical details of the patients from which study isolates of Kpn were collected.

| Patient No. | Micro No. | Admission date | CR-hvKp isolation date | Sex | Age | Unit <sup>a</sup> | Being in ICU during this hospitalization |     | Hospital <sup>b</sup> | <i>bla</i> <sub>NDM</sub> | Mouse lethality (LD <sub>50</sub> , CFU)                | Predominant diagnosis | Liver metastasis | Infectious complications due to CR-hvKp                                                                                                                                | Comorbidity <sup>c</sup>                                                | Antibacterials                                                                                                                                                                                  | Surgery                                                                          | Outcomes | Importation of Klebsiella from another hospital | Prior hospitalization |     |
|-------------|-----------|----------------|------------------------|-----|-----|-------------------|------------------------------------------|-----|-----------------------|---------------------------|---------------------------------------------------------|-----------------------|------------------|------------------------------------------------------------------------------------------------------------------------------------------------------------------------|-------------------------------------------------------------------------|-------------------------------------------------------------------------------------------------------------------------------------------------------------------------------------------------|----------------------------------------------------------------------------------|----------|-------------------------------------------------|-----------------------|-----|
| Patient 1   | 1659      |                | 27.04.2017             |     |     |                   |                                          |     | NDM-1                 | 10 <sup>4</sup>           | Adenocarcinoma of the sigmoid colon                     | Breast cancer         | no               | Yes. Infection of the skin and soft tissues                                                                                                                            | CHD<br>AC<br>HD 2st<br>DM<br>Obesity 2st<br>Pyonephrosis<br>Nephrectomy | 1)Ciprofloxacin, metronidazole<br>2)Cefoperazone/Sulbactam<br>3) Ciprofloxacin, metronidazole<br>4) Meropenem<br>5) Vancomycin<br>6) Fluconazole<br>7) Imipenem<br>8) Colistin<br>9) Tygecyclin |                                                                                  |          |                                                 |                       |     |
|             |           | 12.04.2017     |                        | F   |     | unknown           | CU                                       | yes | 1                     |                           |                                                         |                       |                  | Pneumonia                                                                                                                                                              |                                                                         |                                                                                                                                                                                                 | yes                                                                              | Death    | no                                              | yes                   |     |
|             | 1657      |                | 26.04.2017             |     |     |                   |                                          |     | NDM-1                 | 10 <sup>2</sup>           |                                                         |                       |                  | Sepsis                                                                                                                                                                 |                                                                         |                                                                                                                                                                                                 |                                                                                  |          |                                                 |                       |     |
| Patient 2   | 1970      | 26.03.2018     | 04.04.2018             | M   | 64  | DPD               | no                                       | 1   | NDM-29                | 10 <sup>4</sup>           | Prostate cancer                                         |                       | no               | Urinary infection due to epicystostomy.                                                                                                                                | CHD<br>AC<br>HD 2st<br>MVD<br>AS (<AH 2st)<br>CVD<br>CHF                | 1) Ciprofloxacin<br>2) Imipenem.                                                                                                                                                                | 1) 26-28.03.18 (3 days)<br>2)29.03.-01.04.18 (4 days)                            | no       | Improvement                                     | unknown               | no  |
| Patient 3   | 1971      | 12.03.2018     | 05.04.2018             | M   |     | unknown           | AU                                       | no  | 1                     | NDM-1                     | 10 <sup>5</sup>                                         | Pancreatic cancer     | no               | Postoperative pancreatitis<br>Pancreatic fistula<br>Abscess in the area of the triangular ligament of the liver and in the lesser omentum<br>Drained common bile duct. | Chronic bronchitis<br>DM                                                | Ciprofloxacin, Metronidazole.                                                                                                                                                                   | 19-21.03.18 (3 days),<br>28.03-03.04.18 (7 days).                                | yes      | no change                                       | yes                   | yes |
| Patient 4   | 2501      | 12.07.2019     | 26.07.2019             | M   | 67  | AU                | yes                                      | 1   | NDM-1                 | 10 <sup>4</sup>           | Rectal cancer cT3N1M0, IV<br>Stomach body cancer T2N1M0 |                       | yes              | Postoperative biloma (after liver resection)<br>Atypical resection of the 3rd and 4th liver segments<br>Biliary peritonitis                                            | CHD<br>AC<br>HD 3 st.<br>DM<br>Condition after left-sided phlebectomy.  | 1) Ciprofloxacin, Metronidazole<br>2) Amoxicilline/Clavulanic acid 3) Meropenem, Fosfomycin.                                                                                                    | 1) 17-18.07.19 (2 days)<br>2) 19-25.07.19 (7 days)<br>3) 26.07.-01.08.19(7 days) | yes      | Improvement                                     | yes                   | yes |

|              |            |            |            |    |       |     |    |       |                 |                                                                                                                                                                          |                                    |                                                |                                                                                                                                         |                                                                                                                                                          |                                                                                                           |                         |                      |             |         |     |
|--------------|------------|------------|------------|----|-------|-----|----|-------|-----------------|--------------------------------------------------------------------------------------------------------------------------------------------------------------------------|------------------------------------|------------------------------------------------|-----------------------------------------------------------------------------------------------------------------------------------------|----------------------------------------------------------------------------------------------------------------------------------------------------------|-----------------------------------------------------------------------------------------------------------|-------------------------|----------------------|-------------|---------|-----|
| Patient 5    | 2566       | 18.07.2019 | 31.07.2019 | M  | 49    | RU  | no | 1     | NDM-1           | 10 <sup>4</sup>                                                                                                                                                          | Follicular lymphoma, grade 1-2, IV | no                                             | Sepsis<br>Pyelonephritis<br>Latent mastoiditis<br>Otitis                                                                                | Urolithiasis.<br>Cholelithiasis.                                                                                                                         | 1) Amoxicilline/Clavulanic acid;                                                                          | 1) 24-29.07.19 (6 days) | yes                  | Improvement | yes     | yes |
| Patient 2471 | 03.06.2019 | 17.06.2019 | F          | 60 | SBSTU | no  | 1  | NDM-1 | 10 <sup>4</sup> | Hystero carcinoma, IA st., pT1aN0M0                                                                                                                                      | yes                                | Bacteriuria<br>Ureterohydronephrosis           | DM<br>Obesity<br>Pain syndrome<br>Anemia                                                                                                | no                                                                                                                                                       | -                                                                                                         | no                      | no change            | yes         | yes     |     |
| Patient 2512 | unknown    | 16.07.2019 | M          | 64 | OU    | yes | 2  | NDM-1 | 10 <sup>3</sup> | Cornea injury                                                                                                                                                            | no                                 | Conjunctivitis,<br>Keratitis<br>Uveitis        | unknown                                                                                                                                 | yes<br>(details assignment unknown)                                                                                                                      | unknown                                                                                                   | yes                     | Left eye vision loss | yes         | unknown |     |
| Patient 2024 | 29.07.18   | 01.08.18   | M          | nd | CU    | no  | 1  | no    | 10 <sup>5</sup> | B-cell lymphoma with the defeat of the retroperitoneal lymph nodes, liver, stomach, duodenum, pancreas, hepatic flexure of the colon, inferior vena cava and portal vein | yes                                | Febrile neutropenia.<br>Sepsis.<br>Stomatitis. | HD 2 st.<br>Cardiac risk 2 st.<br>Obstructive jaundice<br>CHC<br>Hepatic failure<br>LEVVD<br>Lower polyneuropathy<br>Radicular ischemia | 1)Trimethoprim/sulfamethoxazole<br>2) Amoxycillin, Ciprofloxacin<br>3) Imipenem<br>4) Meropenem<br>5) Polymyxin B<br>6) Aztreonam, Ceftazidim\ Avibactam | 1) 29.07. - 27.08.18<br>2) 29-31.07.18<br>3)2-3.08.18<br>4)3-16.08.18<br>5) 08-16.08.18<br>6) 16-21.08.18 | no                      | no change            | unknown     | yes     |     |

<sup>a</sup> Unit: CU - coloproctological unit; DPD - day patient department; AU - abdominal unit; RU - radiology unit; SBSTU - skin, bone and soft tissue tumors unit; OU - Ophthalmology unit; CU - chemotherapy unit;

<sup>b</sup> Hospital: 1 - Oncological Centre, St. Petersburg, Russia; 2 - City hospital №2, St. Petersburg, Russia;

<sup>c</sup> Comorbidity: CHD - coronary heart disease; AC - atherosclerotic cardiosclerosis; HD - hypertensive disease; DM - diabetes mellitus; MVD - mitral valve disease; CVD – cerebrovascular disease; AS - aortic stenosis; CHF - chronic heart failure; CHC - Chronic hepatitis C infection; LEVVD - lower extremity varicose vein disease
