# Supplementary material for: Emergence of Hybrid Resistance and Virulence Plasmids Harboring New Delhi Metallo-β-Lactamase in Klebsiella pneumoniae in Russia
Source: Antibiotics (Basel). 2021 Jun 9;10(6):691. doi: 10.3390/antibiotics10060691 (PMC8226487; doi:10.3390/antibiotics10060691)
Supplement: Supplementary file 1 [file antibiotics-10-00691-s001.zip › Supplementary Material Tab S2.pdf]

**Table S2:** Phenotypic and genotypic characteristics of twelve CR-hvKP (1657\_kpn, 1659\_kpn, 1970\_kpn, 1971\_kpn, 2024\_kpn, 2471\_kpn, 2501\_kpn, 2512\_kpn, 2566\_kpn) obtained using hybrid genome assembly, in comparison with the previously reported isolates with hybrid plasmids KpvST147B\_SE1\_1\_NDM, KpvST383\_NDM\_OXA-48, 51015.

| Isolate ID                               | 1657_kpn                                                                         | 1659_kpn                                                 | 1970_kpn                                                 | 1971_kpn                                                                   | 2024_kpn                                                                   | 2471_kpn                                          | 2501_kpn                                                  | 2512_kpn                                                                   | 2566_kpn                                                 | KpvST147B_SE1_1_NDM                                                        | KpvST383_NDM_OXA-48                                        | 51015                                                                                      |
|------------------------------------------|----------------------------------------------------------------------------------|----------------------------------------------------------|----------------------------------------------------------|----------------------------------------------------------------------------|----------------------------------------------------------------------------|---------------------------------------------------|-----------------------------------------------------------|----------------------------------------------------------------------------|----------------------------------------------------------|----------------------------------------------------------------------------|------------------------------------------------------------|--------------------------------------------------------------------------------------------|
| MLST                                     | 395                                                                              | 147                                                      | 147                                                      | 395                                                                        | 395                                                                        | 874                                               | 15                                                        | 395                                                                        | 147                                                      | 147                                                                        | 383                                                        | 15                                                                                         |
| Accession numbers                        | -                                                                                | -                                                        | CP066855-CP066858                                        | MW911666                                                                   | MW911667                                                                   | MW911668                                          | MW911669                                                  | MW911670                                                                   | MW911671                                                 | CP040724-CP040731                                                          | CP034200-CP034202                                          | CP050376.1-CP050381.1                                                                      |
| Capsule type                             | KL2                                                                              | KL20                                                     | KL20                                                     | KL2                                                                        | KL2                                                                        | KL45                                              | KL19                                                      | KL2                                                                        | KL20                                                     | KL35                                                                       | KL30                                                       | KL24                                                                                       |
| O antigen                                | O1v1                                                                             | O2v1                                                     | O2v1                                                     | O1v1                                                                       | O1v1                                                                       | O1v2                                              | O1/O2v2                                                   | O1v1                                                                       | O2v1                                                     | O2v1                                                                       | O1v2                                                       | O1v1                                                                                       |
| Mouse lethality (LD <sub>50</sub> , CFU) | 10 <sup>2</sup>                                                                  | 10 <sup>4</sup>                                          | 10 <sup>4</sup>                                          | 10 <sup>5</sup>                                                            | 10 <sup>5</sup>                                                            | 10 <sup>4</sup>                                   | 10 <sup>4</sup>                                           | 10 <sup>3</sup>                                                            | 10 <sup>4</sup>                                          | -                                                                          | -                                                          | -                                                                                          |
| Meropenem MIC                            | 64                                                                               | 32                                                       | 8                                                        | 16                                                                         | 4                                                                          | 4                                                 | 8                                                         | 4                                                                          | 8                                                        | -                                                                          | -                                                          | -                                                                                          |
| Chromosomal AMR genes                    | oqxAB, fosA, bla <sub>SHV-182</sub>                                              | oqxAB, fosA, bla <sub>SHV-11</sub>                       | fosA5, oxqAB, bla <sub>SHV-67</sub>                      | oqxAB, fosA, bla <sub>SHV-182</sub>                                        | oqxAB, fosA, bla <sub>SHV-182</sub>                                        | oqxAB, fosA, bla <sub>SHV-121</sub>               | oqxAB, fosA, bla <sub>SHV-28</sub> , aac(3)-IIId          | oqxAB, fosA, bla <sub>SHV-182</sub>                                        | oqxAB, fosA, bla <sub>SHV-11</sub>                       | fosA5, oxqAB, bla <sub>SHV-67</sub>                                        | bla <sub>SHV-26</sub> , catA1, fosA, tet(A), mph(A), oxqAB | fosA5, oxqAB, bla <sub>SHV</sub>                                                           |
| Chromosomal CRISPR                       | -                                                                                | type I-E CRISPR systems with 1 CRISPR array (43 spacers) | type I-E CRISPR systems with 1 CRISPR array (43 spacers) | -                                                                          | -                                                                          | -                                                 | type I-E* CRISPR systems with 1 CRISPR array (43 spacers) | -                                                                          | type I-E CRISPR systems with 1 CRISPR array (43 spacers) | type I-E* CRISPR systems with 2 CRISPR array (10+9 spacers)                | type I-E CRISPR systems with 1 CRISPR array (15 spacers)   | type I-E* CRISPR systems with 2 CRISPR array (10+9 spacers)                                |
| Chromosomal virulence genes              | entABES, fepBCDG, ecpABCDER, fimABCEH, ybtAEPQSTUX, fyuA, irp1, irp2, kdsA, silA | entABES, fepBCDG, ecpABCDER, fimABCEH, kdsA, silA        | entABES, fepBCDG, ecpABCDER, fimABCEH, kdsA, silA        | entABES, fepBCDG, ecpABCDER, fimABCEH, ybtAEPQSTUX, fyuA, irp1, irp2, kdsA | entABES, fepBCDG, ecpABCDER, fimABCEH, ybtAEPQSTUX, fyuA, irp1, irp2, kdsA | entABES, fepBCDG, ecpABCDER, fimABCEH, kdsA, silR | entABES, fepBCDG, ecpABCDER, fimABCEH, kdsA, silA         | entABES, fepBCDG, ecpABCDER, fimABCEH, ybtAEPQSTUX, fyuA, irp1, irp2, kdsA | entABES, fepBCDG, ecpABCDER, fimABCEH, kdsA, silA        | kdsA, ybtAEPQSTUX, irp1, irp2, fyuA, fimABCEH, ecpABCDER, fepBCDG, entABES | entABES, fepBCDG, ecpABCDER, fimABCEH, kdsA                | ecpABCDER kdsA, ybtAEPQSTUX, irp1, irp2, fyuA, fimABCEH, ecpABCDER, fepBCDG, entABES, silA |
| RM of non-mosaic plasmids                | -                                                                                | -                                                        | -                                                        | -                                                                          | -                                                                          | FIB/FII: M.EcoJA03P I (type I)                    | FIB/FII: M.EcoJA03PI (type I)                             | -                                                                          | -                                                        | FIB: S.Kpn1420II (type I), M.Kpn928I (type I)                              | -                                                          | -                                                                                          |
| No. of plasmids                          | 1                                                                                | 3                                                        | 3                                                        | 2                                                                          | 4                                                                          | 2                                                 | 2                                                         | 1                                                                          | 2                                                        | 7                                                                          | 2                                                          | 5                                                                                          |

|                      |                 |                                                                                                                           |                                                                                                                                                              |                                                                                                            |                                                                                                                                                       |                                                                                                                                                      |                                                                                                                            |                                                                                                             |                                                                                                                                                                                                                              |                                                                                                                            |                                                                                                                                                  |                                                                                                                                                                                                                                     |                                                                                                                            |
|----------------------|-----------------|---------------------------------------------------------------------------------------------------------------------------|--------------------------------------------------------------------------------------------------------------------------------------------------------------|------------------------------------------------------------------------------------------------------------|-------------------------------------------------------------------------------------------------------------------------------------------------------|------------------------------------------------------------------------------------------------------------------------------------------------------|----------------------------------------------------------------------------------------------------------------------------|-------------------------------------------------------------------------------------------------------------|------------------------------------------------------------------------------------------------------------------------------------------------------------------------------------------------------------------------------|----------------------------------------------------------------------------------------------------------------------------|--------------------------------------------------------------------------------------------------------------------------------------------------|-------------------------------------------------------------------------------------------------------------------------------------------------------------------------------------------------------------------------------------|----------------------------------------------------------------------------------------------------------------------------|
| IncFIB/IncHI1 B      | AMR             | -                                                                                                                         | <i>bla</i> <sub>NDM-1</sub> , mph(A), mph(E), msr(E), armA, aph(3')-VI, qnrS1, sul1, sul2, dfrA5                                                             | sul2, armA, msr(E), qnrS1, aph(3')-VI, <i>bla</i> <sub>NDM-29</sub> , dfrA5, sul1                          | <i>bla</i> <sub>NDM-1</sub> , mph(A), mph(E), msr(E), armA, aph(3')-VI, qnrS1, sul1, sul2, dfrA5                                                      | -                                                                                                                                                    | <i>bla</i> <sub>NDM-1</sub> , mph(A), mph(E), msr(E), aph(3')-VI, qnrS1, sul1, dfrA5                                       | <i>bla</i> <sub>NDM-1</sub> , mph(E), msr(E), armA, aph(3')-VI, qnrS1, sul2                                 | <i>bla</i> <sub>NDM-1</sub> , <i>bla</i> <sub>OXA-1</sub> , <i>bla</i> <sub>CTX-M-15</sub> , <i>bla</i> <sub>TEM-1B</sub> , mph(A), mph(E), msr(E), armA, aph(3')-VI, aac(6')-Ib-cr, qnrS1, sul1, sul2, dfrA1, catB3, tet(A) | <i>bla</i> <sub>NDM-1</sub> , mph(A), mph(E), msr(E), armA, aph(3')-VI, qnrS1, sul1, sul2, dfrA5                           | sul1, sul2, armA, dfrA5, mph(A), msr(E), mph(E), <i>bla</i> <sub>CTX-M-15</sub>                                                                  | <i>bla</i> <sub>NDM-5</sub> , <i>bla</i> <sub>CTXM-15</sub> , qnrS1, aac(6')-Ib, <i>bla</i> <sub>OXA-9</sub> , <i>bla</i> <sub>TEM-1B</sub> , catA1, sul1, sul2, armA, dfrA5, aph(3')-Ia, aph(3')-VI, aadA1, mph(A), mph(E), msr(E) | <i>bla</i> <sub>NDM-1</sub> , qnrS1, dfrA5, sul1, sul2, armA, aph(3')-Ia, aph(3')-VI, mph(A), mph(E), msr(E)               |
|                      | virulence genes | -                                                                                                                         | <i>p</i> <sub>rmpA</sub> , <i>p</i> <sub>rmpA2</sub> , iucABCD, iutA, terABCDEWX YZ, peg-344, pagO, shiF, ydjA, cobW, luxR                                   | iutA, iucABCD, <i>p</i> <sub>rmpA</sub> , <i>p</i> <sub>rmpA2</sub> , peg-344, cobW, luxR pagO, ydjA, shiF | <i>p</i> <sub>rmpA2</sub> , iucABCD, iutA, pagO, shiF, ydjA, cobW                                                                                     | -                                                                                                                                                    | <i>p</i> <sub>rmpA</sub> , <i>p</i> <sub>rmpA2</sub> , iucABCD, iutA, terABCDEW XYZ, peg-344, pagO, shiF, ydjA, cobW, luxR | <i>p</i> <sub>rmpA</sub> , <i>p</i> <sub>rmpA2</sub> , iucABCD, iutA, peg-344, pagO, shiF, ydjA, cobW, luxR | <i>p</i> <sub>rmpA</sub> , <i>p</i> <sub>rmpA2</sub> , iucABCD, iutA, terABCDEWX YZ, peg-344, pagO, shiF, ydjA, cobW, luxR                                                                                                   | <i>p</i> <sub>rmpA</sub> , <i>p</i> <sub>rmpA2</sub> , iucABCD, iutA, terABCDEWX YZ, peg-344, pagO, shiF, ydjA, cobW, luxR | iutA, iucABCD, <i>p</i> <sub>rmpA</sub> , <i>p</i> <sub>rmpA2</sub> , peg-344, terABCDEW XYZ, cobW, luxR, pagO, ydjA, shiF                       | iutA, iucABCD, <i>p</i> <sub>rmpA</sub> , <i>p</i> <sub>rmpA2</sub> , peg-344, terABCDEWX, cobW, luxR, pagO, ydjA, shiF                                                                                                             | iutA, iucABCD, <i>p</i> <sub>rmpA</sub> , <i>p</i> <sub>rmpA2</sub> , peg-344, terABCDEW XYZ, cobW, luxR, pagO, ydjA, shiF |
| IncFIB/IncHI1 B/IncR | AMR             | <i>bla</i> <sub>NDM-1</sub> , <i>bla</i> <sub>TEM-1B</sub> , mph(A), aph(3')-VI, qnrS1, sul1, dfrA1, dfrA5, catA1, tet(A) | -                                                                                                                                                            | -                                                                                                          | -                                                                                                                                                     | qnrS1, aac(6')-Ib-cr, tet(A), dfrA1, sul1, catA1, catB3, <i>bla</i> <sub>CTX-M-15</sub> , <i>bla</i> <sub>OXA-1</sub> , <i>bla</i> <sub>TEM-1B</sub> | -                                                                                                                          | -                                                                                                           | -                                                                                                                                                                                                                            | -                                                                                                                          | -                                                                                                                                                | -                                                                                                                                                                                                                                   | -                                                                                                                          |
|                      | virulence genes | <i>p</i> <sub>rmpA</sub> , <i>p</i> <sub>rmpA2</sub> , iucABCD, iutA, terABCDEWX YZ, peg-344, pagO, shiF, ydjA, cobW      | -                                                                                                                                                            | -                                                                                                          | -                                                                                                                                                     | iucA, <i>p</i> <sub>rmpA</sub> , peg-344, luxR, shiF                                                                                                 | -                                                                                                                          | -                                                                                                           | -                                                                                                                                                                                                                            | -                                                                                                                          | -                                                                                                                                                | -                                                                                                                                                                                                                                   | -                                                                                                                          |
| AMR genes of IncFIB  |                 | -                                                                                                                         | -                                                                                                                                                            | dfrA5                                                                                                      | -                                                                                                                                                     | -                                                                                                                                                    | -                                                                                                                          | -                                                                                                           | -                                                                                                                                                                                                                            | -                                                                                                                          | aac(6')-Ib-cr, <i>bla</i> <sub>OXA-1</sub> , catB3, arr-3, sul1, <i>bla</i> <sub>CTX-M-15</sub> , qnrS1, aph(3')-VI, <i>bla</i> <sub>NDM-1</sub> | -                                                                                                                                                                                                                                   | -                                                                                                                          |
| AMR genes of IncR    |                 | -                                                                                                                         | <i>bla</i> <sub>OXA-9</sub> , <i>bla</i> <sub>CTX-M-15</sub> , <i>bla</i> <sub>TEM-1A</sub> , aac(6')-Ib, aadA1, qnrS1; <b>virulence factors:</b> merACDEPRT | <i>bla</i> <sub>TEM-1A</sub> , <i>bla</i> <sub>OXA-9</sub> , aadA, aac(6')-Ib                              | <i>bla</i> <sub>OXA-1</sub> , <i>bla</i> <sub>CTX-M-15</sub> , <i>bla</i> <sub>TEM-1B</sub> , aac(6')-Ib-cr, qnrS1, sul1, dfrA1, catA1, catB3, tet(A) | -                                                                                                                                                    | -                                                                                                                          | -                                                                                                           | -                                                                                                                                                                                                                            | <i>bla</i> <sub>CTX-M-15</sub> , qnrS1; <b>virulence factors:</b> merACDEPRT                                               | aac(6')-Ib, aadA1, <i>bla</i> <sub>OXA-9</sub> , <i>bla</i> <sub>TEM-1A</sub>                                                                    | -                                                                                                                                                                                                                                   | -                                                                                                                          |
| AMR genes of IncL    |                 | -                                                                                                                         | -                                                                                                                                                            | -                                                                                                          | -                                                                                                                                                     | -                                                                                                                                                    | -                                                                                                                          | -                                                                                                           | -                                                                                                                                                                                                                            | -                                                                                                                          | -                                                                                                                                                | aph(6)-Id, aph(3')-Ib,                                                                                                                                                                                                              | -                                                                                                                          |

|                         |                    |   |         |   |   |         |                                                                                                                    |                                                                                                                                                                        |   |   |                        |                                                                                   |                                                                                                                                                                                                            |
|-------------------------|--------------------|---|---------|---|---|---------|--------------------------------------------------------------------------------------------------------------------|------------------------------------------------------------------------------------------------------------------------------------------------------------------------|---|---|------------------------|-----------------------------------------------------------------------------------|------------------------------------------------------------------------------------------------------------------------------------------------------------------------------------------------------------|
|                         |                    |   |         |   |   |         |                                                                                                                    |                                                                                                                                                                        |   |   |                        | aph(3')-VIb,<br><i>bla</i> <sub>CTX-M-14b</sub> ,<br><i>bla</i> <sub>OXA-48</sub> |                                                                                                                                                                                                            |
| AMR of<br>IncFIB/IncFII | AMR                | - | -       | - | - | -       | <i>bla</i> <sub>OXA-1</sub> ,<br><i>bla</i> <sub>CTX-M-15</sub> ,<br>aph(3')-Ia,<br>aac(6')-Ib-cr,<br>catA1, catB3 | <i>bla</i> <sub>OXA-1</sub> , <i>bla</i> <sub>CTX-M-15</sub> , <i>bla</i> <sub>TEM-1B</sub> ,<br>mph(A),<br>aac(6')-Ib-cr,<br>aadA2, sul1,<br>dfrA12, catB3,<br>tet(A) | - | - | -                      | -                                                                                 | aac(3)-IIId,<br>mph(A), sul2,<br>aph(3')-Ib,<br>aph(6)-Id,<br>catB3,<br><i>bla</i> <sub>OXA-1</sub> ,<br>aac(6')-Ib-cr,<br><i>bla</i> <sub>CTX-M-15</sub> ,<br>aph(3')-Ia,<br><i>bla</i> <sub>TEM-1B</sub> |
|                         | virulence<br>genes |   |         |   |   | -       | arsABCDR,<br>pcoABCDER<br>S,<br>silABCEFGP<br>RS                                                                   | arsABCDR,<br>pcoABCDERS,<br>silABCEFGPR<br>S                                                                                                                           |   |   |                        |                                                                                   | arsABCDR,<br>pcoABCDER<br>S,<br>silABCEFGP<br>RS,                                                                                                                                                          |
| Other plasmids          |                    | - | ColRNAI | - | - | ColRNAI | -                                                                                                                  |                                                                                                                                                                        | - | - | IncFIB, IncR,<br>IncX4 | -                                                                                 | IncFII,<br>ColRNAI                                                                                                                                                                                         |
