# Supplementary material for: Emergence of Hybrid Resistance and Virulence Plasmids Harboring New Delhi Metallo-β-Lactamase in Klebsiella pneumoniae in Russia
Source: Antibiotics (Basel). 2021 Jun 9;10(6):691. doi: 10.3390/antibiotics10060691 (PMC8226487; doi:10.3390/antibiotics10060691)
Supplement: Supplementary file 1 [file antibiotics-10-00691-s001.zip › Supplementary Material Tab S4.pdf]

**Table S4:** MICs for the NDM variants under standard and zinc-limiting conditions (50  $\mu$ M EDTA). Shown are the MICs (mg/L) for  $\beta$ -lactams of the clinical isolate 1970\_kpn of Kpn, *E. coli* XL10-Gold, *E. coli* XL10-Gold harboring *bla*<sub>NDM-1</sub> and *bla*<sub>NDM-29</sub>.

[illegible]
